# Supplementary material for: Genome-wide co-occupancy of AML1-ETO and N-CoR defines the t(8;21) AML signature in leukemic cells
Source: PubMed Central journal article supplement (PMC4434520; doi:10.1186/s12864-015-1445-0), 2015-04-17

**A.**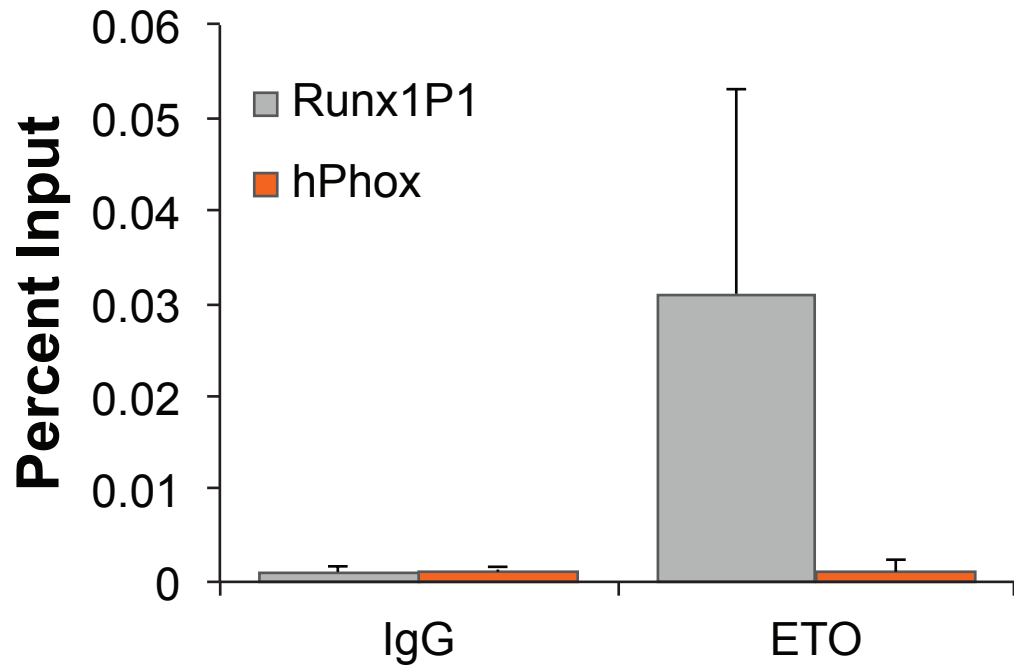**B.**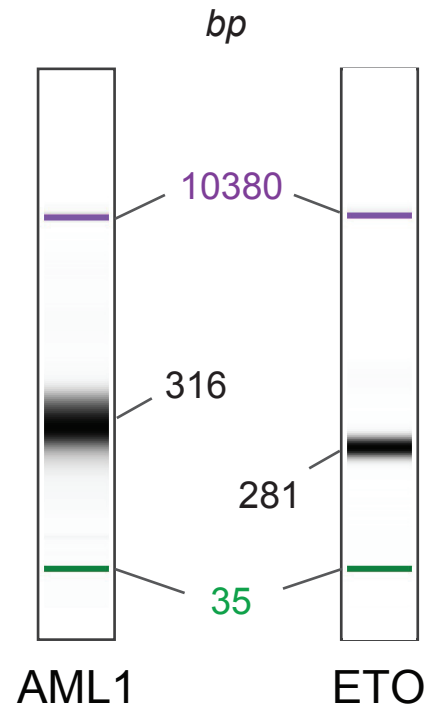

Supplement: 12864_2015_1445_MOESM2_ESM.pdf [file 12864_2015_1445_MOESM2_ESM.pdf]
