# Supplementary material for: Genome-wide co-occupancy of AML1-ETO and N-CoR defines the t(8;21) AML signature in leukemic cells
Source: PubMed Central journal article supplement (PMC4434520; doi:10.1186/s12864-015-1445-0), 2015-04-17
Supplement: 12864_2015_1445_MOESM3_ESM.pdf [file 12864_2015_1445_MOESM3_ESM.pdf]

**Table S1 ChIP-Seq library overview.** Shown are the number of reads and peaks called for each replicate ChIP-Seq library.

| ChIP library     | Million reads | No. Peaks <sup>a</sup> | No. Peaks <sup>b</sup> | No. Peaks <sup>c</sup> |
|------------------|---------------|------------------------|------------------------|------------------------|
| AML1 (rep 1)     | 19            | 23,611                 | 11,692                 | 1,849                  |
| AML1 (rep 2)     | 22            |                        |                        |                        |
| AML1-ETO (rep 1) | 24            | 30,911                 | 18,087                 | 5,879                  |
| AML1-ETO (rep 2) | 22            |                        |                        |                        |
| N-CoR (rep 1)    | 34            | 21,163                 | 10,004                 | 1,806                  |
| N-CoR (rep 2)    | 28            |                        |                        |                        |
| p300 (rep 1)     | 23            | 25,301                 | 11,020                 | 361                    |
| p300 (rep 2)     | 18            |                        |                        |                        |
| H3K4me3 (rep 1)  | 18            | 22,386                 | 19,632                 | 361                    |
| H3K4me3 (rep 2)  | 18            |                        |                        |                        |
| H3K27me3 (rep 1) | 10            | NA                     | NA                     | NA                     |
| H3K27me3 (rep 2) | 14            |                        |                        |                        |

a. ( $p < 10^{-10}$ )

b. ( $p < 10^{-20}$ )

c. ( $p < 10^{-75}$ )
