# Supplementary material for: Genome-wide co-occupancy of AML1-ETO and N-CoR defines the t(8;21) AML signature in leukemic cells
Source: PubMed Central journal article supplement (PMC4434520; doi:10.1186/s12864-015-1445-0), 2015-04-17
Supplement: 12864_2015_1445_MOESM9_ESM.pdf [file 12864_2015_1445_MOESM9_ESM.pdf]

**Table S2 Oligonucleotides used in ChIP-PCR validation studies.**

| <b>Locus</b> | <b>Oligo (sense/antisense) 5'-3'</b>               |
|--------------|----------------------------------------------------|
| Runx1P1      | CTGTGGGTTGGTGATGCTC<br>AGCCTGGCAGTGTCAGAAGT        |
| Phox (cybb)  | CCAATGATTATTAGCCAATTTCTG<br>CATGGTGGCAGAGGTTGAATGT |
| RPS6KA1      | AGGCAGGAACTGAGTCATCC<br>ATGCCTTCTGACTCCTGAGC       |
| TYROPB       | AGGAGACGGGGACTTCTAGC<br>TCATCCTCCAGCACCCCTAAC      |
| LAPTM5       | GAGGAAGCCCTTCCAGACTC<br>GCCTAGACCCACCCTACTCC       |
